# Supplementary material for: Integrated in situ transesterification for improved biodiesel production from oleaginous yeast: a value proposition for possible industrial implication
Source: Royal Society of Chemistry journal article supplement (doi:10.1039/c6ra14003c), 2016-01-01
Supplement: c6ra14003c1.pdf [file c6ra14003c1.pdf]

### Supplementary Information

#### Calculation of energy consumption in different steps of conventional transesterification method:

1. **Drying-** Power rating of hot air oven is 500W, when operated for 12h consumed about **6 kWh/kg biomass**
2. **Cell disruption-** Power requirement of sonicator is 125W, operated for 10 mins (0.17 h) to process 0.5g biomass,  
Therefore, energy consumption=  $(125W * 0.17h) / 0.5g$   
**= 42.5 kWh/kg biomass**
3. **Lipid extraction-** Power requirement of lipid extractor is 125W, operated for 30min  
Therefore, energy consumption= 0.0635 kWh for 1.8g biomass (300mg biomass in each of the 6 cups) i.e. **34.72 kWh/kg biomass**
4. **Transesterification-** Hot plate magnetic stirrer consumes **2.4 kWh/kg biomass** in 4 h with a power requirement of 600W

Total energy consumed in the process= **85.62 kWh**

#### Energy consumption in *In situ* transesterification method:

Drying step is bypassed and lipid extraction step is combined with transesterification.

Cell disruption step is same for both the processes.

**Transesterification-** Hot plate magnetic stirrer consumes **3.6 kWh/kg biomass** in 6 h with a power requirement of 600W

Total energy consumed in the process= **41.1 kWh**
